# Supplementary material for: Diammonium spacer-induced stable zigzag type 2D Dion–Jacobson lead/tin-based perovskite solar cells
Source: Royal Society of Chemistry journal article supplement (doi:10.1039/d3dt02041j), 2023-01-01
Supplement: d3dt02041j1.pdf [file d3dt02041j1.pdf]

## Supporting Information

### **Diammonium Spacer-Induced Stable Zigzag Type 2D Dion-Jacobson Lead/Tin-Based Perovskite Solar Cells**

**Mi-Hee Jung<sup>\*,†</sup>**

□Department of Nanotechnology and Advanced Materials Engineering, Sejong University, 209, Neungdong-ro, Gwangjin-gu, Seoul 05006, Republic of Korea; Fax: +82-2-3408-4342; Tel: +82-2-6935-2597

\*To whom correspondence should be addressed.

E-mail: [mhjung@sejong.ac.kr](mailto:mhjung@sejong.ac.kr)

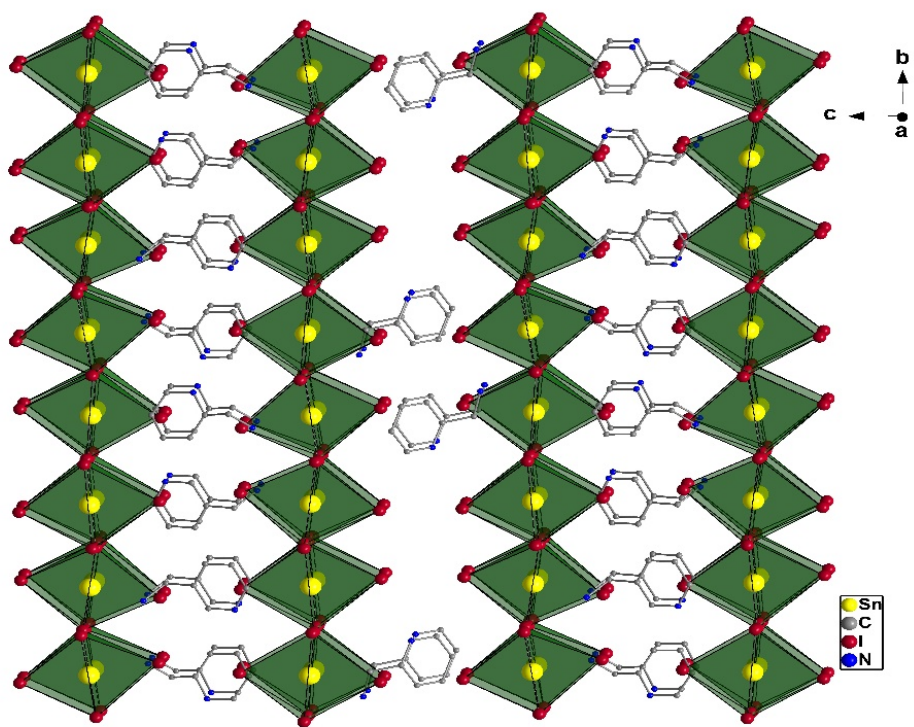

**Figure S1.** Crystal structure of  $C_{18}H_0I_{16}N_6Sn_4$

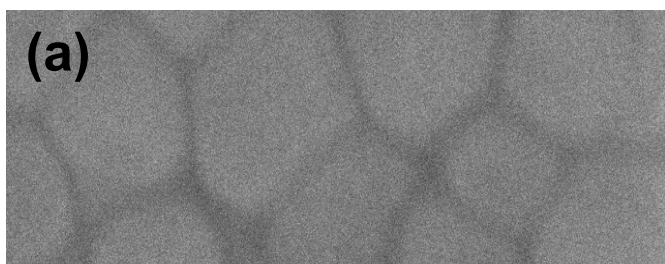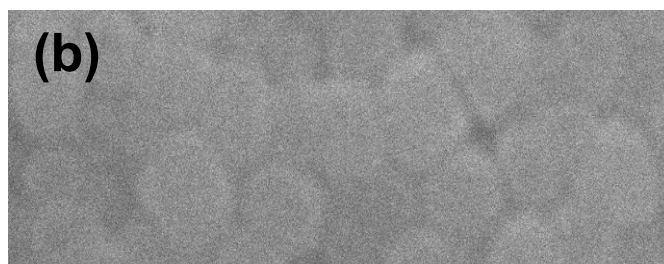

**Figure S2.** The enlarged SEM images of the (a) 10% and (b) 15% of 3API<sub>2</sub> added FA(Pb<sub>0.5</sub>Sn<sub>0.5</sub>)I<sub>3</sub> perovskite films.

**Table S1.** Full width half maximum (FWHM) values calculated from the (110) diffraction peak in Figure

| <b>3API<sub>2</sub> added<br/>ammout/%</b> | <b>0</b> | <b>5</b> | <b>10</b> | <b>15</b> | <b>20</b> |
|--------------------------------------------|----------|----------|-----------|-----------|-----------|
| <b>FWHM (110)<br/>/degrees</b>             | 0.095    | 0.097    | 0.098     | 0.094     | 0.099     |
| <b>FWHM (220)<br/>/degrees</b>             | 0.123    | 0.121    | 0.121     | 0.120     | 0.124     |

7b.

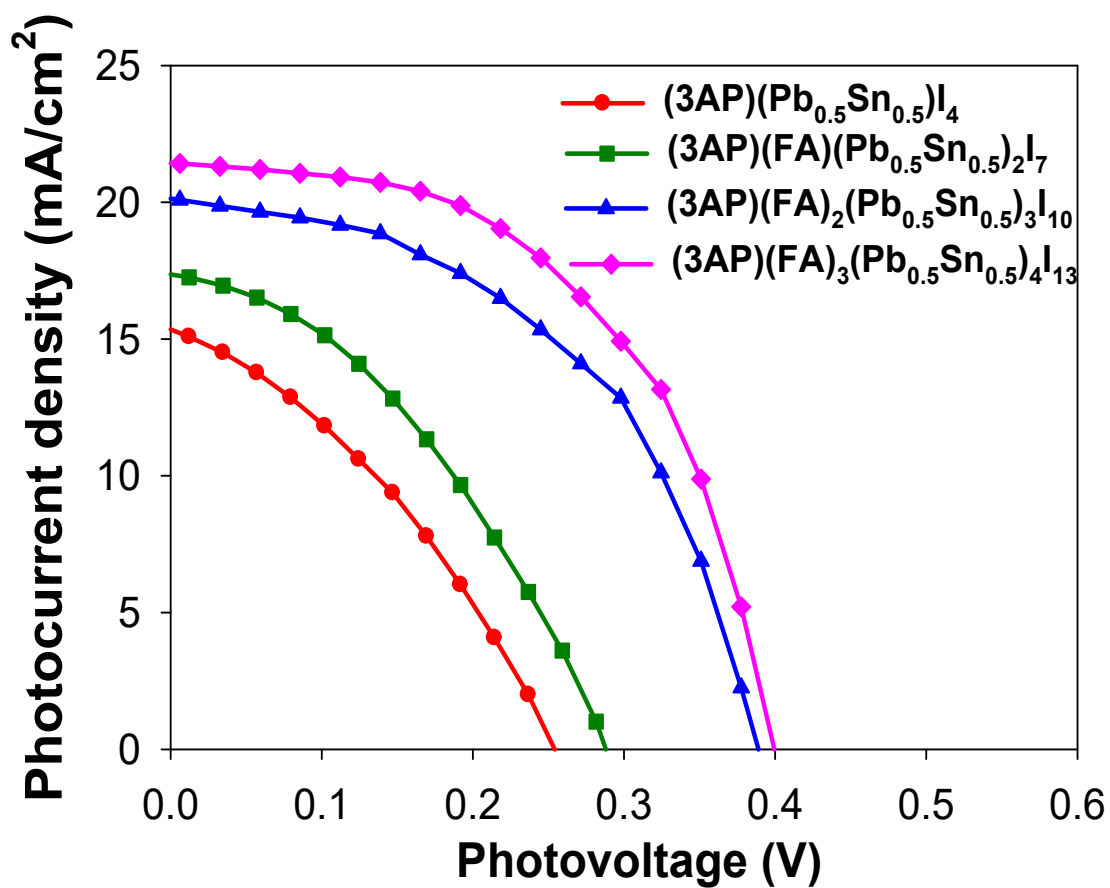

Figure S3. J-V curves of the 2D DJ (3AP)FA<sub>n-1</sub>(Pb<sub>0.5</sub>Sn<sub>0.5</sub>)<sub>n</sub>I<sub>3n+1</sub> (n = 1, 2, 3, 4) based devices

**Table S2.** The photovoltaic parameters of the 2D DJ (3AP)FA<sub>n-1</sub>(Pb<sub>0.5</sub>Sn<sub>0.5</sub>)<sub>n</sub>I<sub>3n+1</sub> (n = 1, 2, 3, 4) based devices

| <b>Perovskites</b>                                                                         | <b>Jsc<br/>[mA/cm<sup>2</sup>]</b> | <b>Voc<br/>[V]</b> | <b>FF<br/>[%]</b> | <b>PCE<br/>[%]</b> |
|--------------------------------------------------------------------------------------------|------------------------------------|--------------------|-------------------|--------------------|
| (3AP)(Pb <sub>0.5</sub> Sn <sub>0.5</sub> )I <sub>4</sub>                                  | 15.47                              | 0.25               | 35.04             | 1.38               |
| (3AP)(FA)(Pb <sub>0.5</sub> Sn <sub>0.5</sub> ) <sub>2</sub> I <sub>7</sub>                | 17.42                              | 0.29               | 38.27             | 1.92               |
| (3AP)(FA) <sub>2</sub> (Pb <sub>0.5</sub> Sn <sub>0.5</sub> ) <sub>3</sub> I <sub>10</sub> | 20.10                              | 0.39               | 49.39             | 3.86               |
| (3AP)(FA) <sub>3</sub> (Pb <sub>0.5</sub> Sn <sub>0.5</sub> ) <sub>4</sub> I <sub>13</sub> | 21.37                              | 0.40               | 51.81             | 4.42               |
